# Supplementary material for: Neurogenesis-mediated forgetting minimizes proactive interference
Source: PubMed Central journal article supplement (PMC4773435; doi:10.1038/ncomms10838), 2016-02-26
Supplement: ncomms10838-s1.pdf [file ncomms10838-s1.pdf]

## Supplementary Information

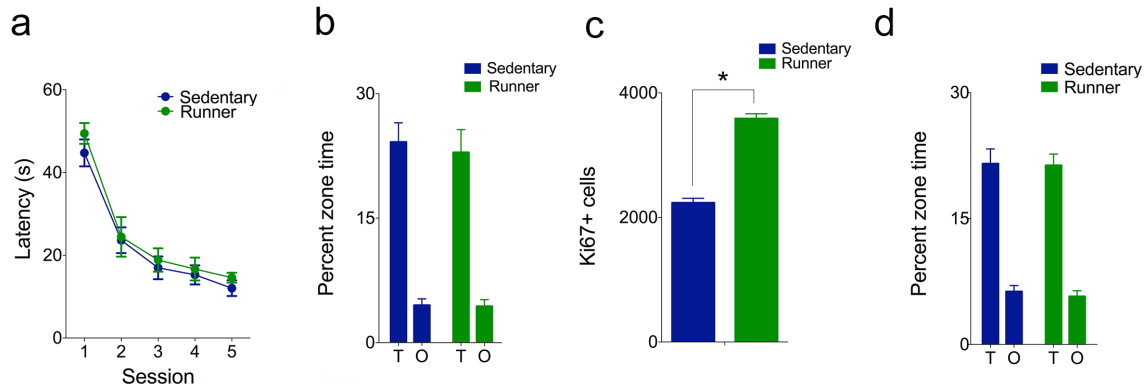

**Supplementary Figure 1.** **a.** Latency to locate platform in water maze training did not differ in mice assigned to running vs. sedentary group [Main effect of Day:  $F_{4,184} = 139.69$ ,  $p < 0.00001$ ; Group and Group  $\times$  Day interaction,  $F_s < 1$ ]. **b.** At the completion of training both runner ( $n=24$ ) and sedentary mice ( $n=24$ ) searched selectively in the zone of the pool that formerly contained the platform [Main effect of Zone:  $F_{1,46} = 216.38$ ,  $p < 0.00001$ ; Group and Group  $\times$  Zone interaction,  $F_s < 1$ ]. **c.** Numbers of proliferating (i.e., Ki67<sup>+</sup>) cells were elevated following running [ $F_{1,12} = 24.79$ ,  $p < 0.001$ ]. **d.** At the completion of reversal training both runner and sedentary mice searched selectively in the zone of the pool where the reversal platform had been located [Main effect of Zone:  $F_{1,46} = 141.05$ ,  $p < 0.00001$ ; Group and Group  $\times$  Zone interaction,  $F_s < 1$ ]. Data analysis used ANOVA (panels b,c,d) and repeated measures ANOVA (panel a). Data shown are mean  $\pm$  SEM.

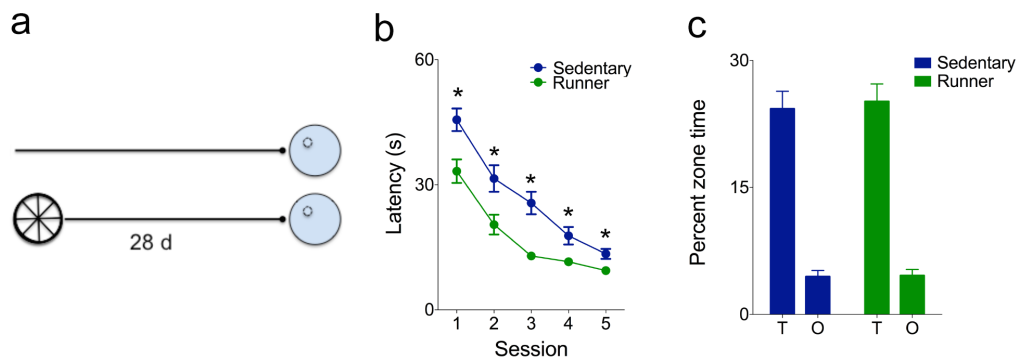

**Supplementary Figure 2. a.** Mice were given access to a running wheel (n=15) or remained sedentary (n=16) for 4 weeks prior to water maze training. **b.** Mice that ran before training located the platform more efficiently (Main effects of Day [ $F_{4,120} = 61.46, p < 0.00001$ ] and Group [ $F_{4,120} = 29.75, p < 0.00001$ ]). **c.** At the completion of training, both runner and sedentary mice searched selectively in the zone of the pool that formerly contained the platform [Main effect of Zone:  $F_{1,30} = 205.24, p < 0.00001$ ; Group and Group  $\times$  Zone interaction,  $F_s < 1$ ]. Data analysis used ANOVA (panel c) and repeated measures ANOVA (panel b). \* $p < 0.05$  by Newman-Keuls post hoc tests for multiple comparisons. Data shown are mean  $\pm$  SEM.

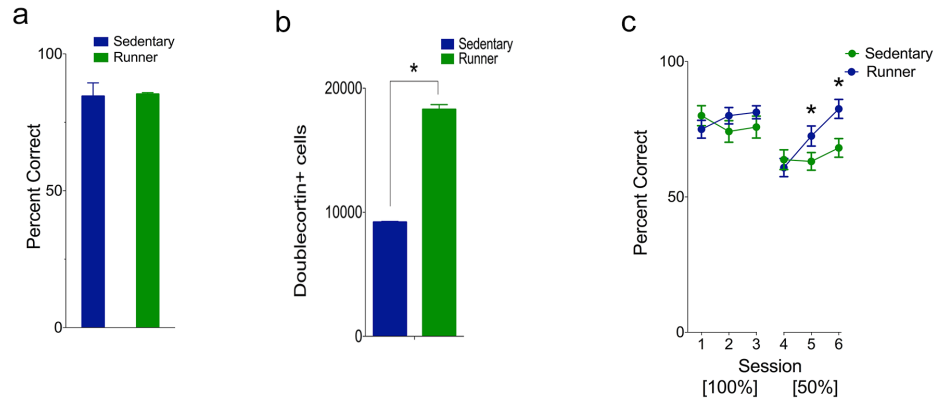

**Supplementary Figure 3. a.** Mice ( $n=12$  sedentary,  $n=16$  runner) reached a stable high level of performance at the end of the training period ( $F_{1,26} = 0.05$ ,  $p > 0.05$ ). **b.** Running increased the number of immature neurons in the dentate gyrus [ $F_{1,12} = 48.08$ ,  $p < 0.00001$ ]. **c.** After 4 weeks of running there was no significant difference in retention of the odor context pairings (test sessions 1-3). However, when the odor concentration was decreased performance was reduced in mice that ran after training [Group  $\times$  Session interaction:  $F_{5,130} = 2.87$ ,  $p < 0.05$ ]. Data analysis used ANOVA (panel a,b) and repeated measures ANOVA (panel c). \* $p < 0.05$  by Newman-Keuls post hoc tests for multiple comparisons. Data shown are mean  $\pm$  SEM.

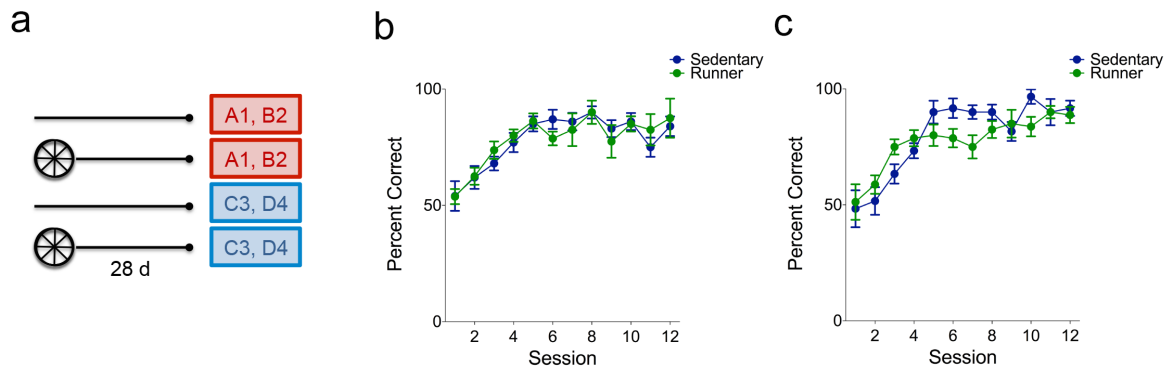

**Supplementary Figure 4. a.** Mice had access to a running wheel (n=8) for 4 weeks or were housed conventionally (n=8), and then were trained in the odor-context paired associate task (either A1-B2 or C3-D4). **b-c.** Acquisition was similar in runner (n=8) and sedentary (n=8) mice for both odor-context pairs (A1-B2, main effect of session only,  $F_{11,154} = 10.73$ ,  $p < 0.00001$ ; C3-D4, main effect of session only,  $F_{11,154} = 16.29$ ,  $p < 0.00001$ ). Data analysis used repeated measures ANOVA (panels b,c). Data shown are mean  $\pm$  SEM.

a

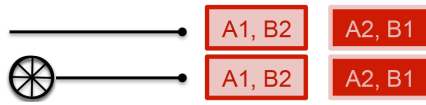

b

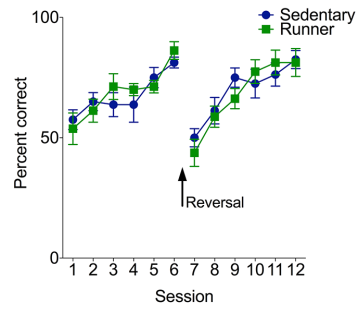

**Supplementary Figure 5. a.** Mice had access to a running wheel for 4 weeks (n=8) or were housed without a wheel (n=8). The mice were then trained in the odor-context paired associates task. After acquiring the A1,B2 pairing the mice were trained in a reversal condition (A2,B1). **b.** There was no significant difference in either the acquisition of the initial odor context pairing or the reversal pairings (Main effect of Session only:  $F_{5,140} = 27.92$ ,  $p < 0.00001$ ; Group  $\times$  Session  $\times$  Phase interaction:  $F_{5,140} = 0.98$ ,  $p = 0.43$ ). Data analysis used repeated measures ANOVA (panel b). Data shown are mean  $\pm$  SEM.

**Supplementary Table 1.** Odor-context pairings in the training, high interference and low interference conditions.

|             | Training  |           | High interference |           | Low interference |           |
|-------------|-----------|-----------|-------------------|-----------|------------------|-----------|
|             | Context A | Context B | Context A         | Context B | Context C        | Context D |
| #1 Coffee   | S+        | S-        | S-                | S+        |                  |           |
| #2 Cinnamon | S-        | S+        | S+                | S-        |                  |           |
| #3 Ginger   |           |           |                   |           | S+               | S-        |
| #4 Oregano  |           |           |                   |           | S-               | S+        |
